# Supplementary material for: Machine learning-derived identification of tumor-infiltrating immune cell-related signature for improving prognosis and immunotherapy responses in patients with skin cutaneous melanoma
Source: Cancer Cell Int. 2023 Sep 26;23:214. doi: 10.1186/s12935-023-03048-9 (PMC10521465; doi:10.1186/s12935-023-03048-9)
Supplement: Supplementary file 1 — Additional file 1: Table S1. Clinical characteristics of the 30 SKCM patients used in this study. [file 12935_2023_3048_MOESM1_ESM.xlsx]

## Sheet: Sheet1
No. of patients	30
Age (median, range)	51(26-74)
Gender
Female	10
Male	20
Stage
I	2
II	11
III	14
IV	3
