# Supplementary material for: Machine learning-derived identification of tumor-infiltrating immune cell-related signature for improving prognosis and immunotherapy responses in patients with skin cutaneous melanoma
Source: Cancer Cell Int. 2023 Sep 26;23:214. doi: 10.1186/s12935-023-03048-9 (PMC10521465; doi:10.1186/s12935-023-03048-9)
Supplement: Supplementary file 4 — Additional file 4: Table S4. Differentially expressed genes between 2 clusters in the meta-cohort. [file 12935_2023_3048_MOESM4_ESM.xlsx]

## Sheet: Sheet1
id	logFC	AveExpr	t	P.Value	adj.P.Val	B
OR7E24	6.50247	1.83544	127.765	0	0	1136.65
CACNG8	6.6182	1.92567	126.396	0	0	1129.2
MUSK	7.43066	2.12849	125.733	0	0	1125.55
CGB1	6.79789	1.9157	123.325	0	0	1112.19
IL1RL1	6.8318	1.99922	121.352	0	0	1101.06
OR8B2	6.42755	1.81198	121.003	0	0	1099.07
DEFB114	6.25785	1.81093	119.259	0	0	1089.07
PRAMEF6	6.25071	1.76832	117.079	0	0	1076.37
UGT1A10	6.21241	1.75301	116.053	0	0	1070.32
OR10H1	6.18628	1.74697	115.797	0	0	1068.8
DEFB134	6.3544	1.82063	115.46	0	0	1066.8
GABRB2	6.24994	1.80646	115.083	0	0	1064.56
DEFB136	6.18118	1.78041	113.33	0	0	1054.03
PRM2	6.13865	1.73051	112.605	0	0	1049.63
TRIM71	6.59618	2.01754	112.513	0	0	1049.07
OR5L2	6.15207	1.73355	112.416	0	0	1048.48
SPINT4	6.16481	1.73981	112.227	0	0	1047.33
IFNA6	6.13511	1.72956	111.734	0	0	1044.32
SMR3A	6.18615	1.74835	111.578	0	0	1043.36
OR13C5	6.15163	1.73616	111.452	0	0	1042.59
SLC2A7	6.19634	1.77679	111.44	0	0	1042.52
RBMY1B	6.18742	1.75075	111.371	0	0	1042.09
HTR1A	6.14852	1.7394	110.491	0	0	1036.67
KCNC1	6.10527	1.76638	109.969	0	0	1033.43
OR5H14	6.07645	1.71226	109.099	0	0	1028
C12orf42	6.04837	1.75196	109.028	0	0	1027.56
SYT10	6.08191	1.71442	108.966	0	0	1027.18
TKTL2	6.10817	1.74387	108.443	0	0	1023.89
HTR1B	6.05564	1.76296	106.938	0	0	1014.36
BTNL8	6.0513	1.77405	106.51	0	0	1011.63
GNRHR	6.02853	1.74938	106.404	0	0	1010.95
GRID2	6.21462	1.81621	106.015	0	0	1008.46
AFM	6.04237	1.71273	103.982	0	0	995.298
OSTN	6.24023	1.83359	96.8382	0	0	947.191
PGAM2	6.24658	1.83376	88.2695	0	0	885.289
TTC21B	5.92965	3.15554	75.7497	0	0	785.237
DEFB106A	5.93524	1.97854	71.7098	0	0	750.159
CHD2	5.95257	3.96207	71.1073	0	0	744.799
CD8B	5.91042	2.50017	67.5201	3.99049449698408e-315	1.12961690375975e-312	712.167
NPB	5.95925	2.04603	60.8652	2.52021e-287	6.95578e-285	648.168
TREX1	7.90232	2.85301	58.089	4.11355e-275	1.10765e-272	620.049
ICAM4	6.0908	2.16985	56.6626	1.08893e-268	2.86233e-266	605.261
CIDEB	8.60876	3.0824	56.361	2.55868e-267	6.56927e-265	602.104
PTPRCAP	8.36595	3.04694	53.062	5.15143e-252	1.29254e-249	566.865
TNFRSF6B	7.17541	2.63344	51.4879	1.63922e-244	4.02155e-242	549.589
BOLA2	9.15653	3.39437	50.6236	2.45631e-240	5.89514e-238	539.973
RSC1A1	7.04368	2.59738	50.3153	7.75085e-239	1.82063e-236	536.521
CCL27	5.96577	2.12569	49.5736	3.28985e-235	7.56665e-233	528.167
SFT2D3	7.21592	2.70243	48.5834	2.54773e-230	5.74019e-228	516.909
HYI	7.07426	2.65548	47.9588	3.2959e-227	7.27735e-225	509.743
C19orf33	5.92596	2.05081	47.3158	5.5306e-224	1.19721e-221	502.317
B3GNT7	5.52322	3.51813	46.9002	6.90735e-222	1.46648e-219	497.489
UTP14C	8.85888	3.39052	45.1769	4.29389e-213	8.94426e-211	477.238
NME1-NME2	6.43977	2.54028	39.0745	1.13008e-180	2.31038e-178	402.579
PIGY	8.43057	3.53482	31.9102	2.59118e-140	5.20121e-138	309.644
ZNF593	7.16144	3.01486	30.6377	6.0677e-133	1.1962e-130	292.677
SUMO1	2.81853	5.4275	23.058	1.0945e-88	2.11987e-86	190.817
